# Supplementary material for: User Preference Analysis for an Integrated System of Bus Rapid Transit and On-Demand Shared Mobility Services in Amman, Jordan
Source: MDPI journal article supplement (doi:10.3390/urbansci7040111), 2023-10-25
Supplement: s1 [file s1]

**Blank consent form S2: Consent to participation in a research study**

I, \_\_\_\_\_, agree to participate in the research study conducted by Farah Altarifi. I have been informed about the general topic of the study and how the information I provide will be used. I am aware that my answers are confidential, and only the researchers will have access to them. They will be used anonymously for the purpose of the study.

I understand that I have the right to examine the results and general conclusions of this investigation. I am participating in this research voluntarily and without any form of coercion.

Participant's Name: \_\_\_\_\_

Date: \_\_\_\_\_

Location: \_\_\_\_\_

Signature: \_\_\_\_\_
